# Supplementary material for: Can circumcision be avoided in adult male with phimosis? Results of the PhimoStopTM prospective trial
Source: PubMed Central journal article supplement — Transl Androl Urol. 2021 Nov;10(11):4152–60. doi: 10.21037/tau-21-673 (PMC8661253; doi:10.21037/tau-21-673), 2021-11
Supplement: tau-10-11-4152-supplementary.pdf [file tau-10-11-4152-supplementary.pdf]

## Supplementary

**Table S1** Endpoints in PP

| Variable                                     | Value      |
|----------------------------------------------|------------|
| Patients with complete follow-up (n, %)      |            |
| With indication for circumcision             | 34 (47.9%) |
| Without indication for circumcision          | 37 (52.1%) |
| “Are you satisfied by the results?” (n, %)   |            |
| Yes                                          | 41 (57.7%) |
| No                                           | 25 (35.2%) |
| I don’t know                                 | 5 (7.0%)   |
| “Would you recommend it?” (n, %)             |            |
| Yes                                          | 57 (80.3%) |
| No                                           | 9 (12.7%)  |
| I don’t know                                 | 5 (7.0%)   |
| Penile sensitivity (n, %)                    |            |
| Reduced                                      | 13 (18.3%) |
| Increased                                    | 12 (16.9%) |
| Not modified                                 | 46 (64.8%) |
| Erectile function (n, %)                     |            |
| Improved                                     | 10 (14.1%) |
| Worsened                                     | 5 (7.0%)   |
| Not modified                                 | 56 (78.9%) |
| Ejaculation time (n, %)                      |            |
| Improved                                     | 9 (12.7%)  |
| Worsened                                     | 1 (1.4%)   |
| Not modified                                 | 61 (85.9%) |
| Orgasmic function (n, %)                     |            |
| Improved                                     | 1 (1.4%)   |
| Worsened                                     | 7 (9.9%)   |
| Not modified                                 | 63 (88.7%) |
| Persistent painful sexual intercourse (n, %) |            |
| Yes                                          | 17 (23.9%) |
| No                                           | 28 (39.4%) |
| I don’t know                                 | 26 (36.6%) |
| Good cosmetic and functional result (n, %)   | 44 (62.0%) |
| Persistent phimosis (n, %)                   | 41 (57.7%) |
